# Supplementary material for: Maternal depression or anxiety during pregnancy and offspring type 1 diabetes: a population-based family-design cohort study
Source: HighWire-hosted journal article supplement (doi:10.1136/bmjdrc-2023-003303), 2023-04-01
Supplement: bmjdrc-2023-003303supp003_data_supplement.pdf [file bmjdrc-2023-003303supp003_data_supplement.pdf]

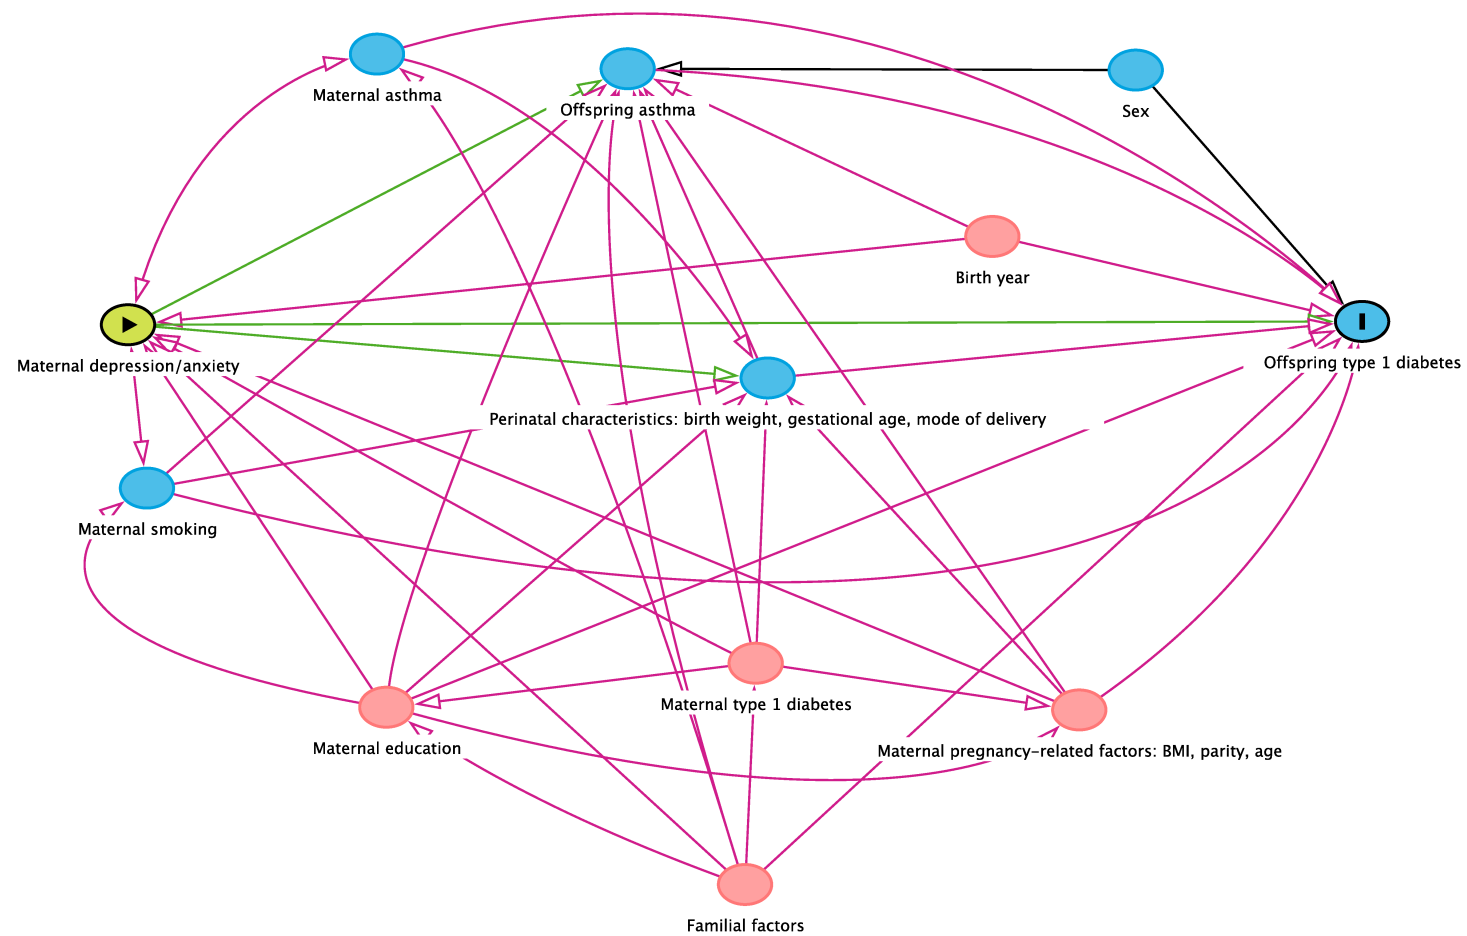

**Supplemental Figure S2.** Directed acyclic graph of the association between maternal depression/anxiety during pregnancy and offspring type 1 diabetes.
