# Supplementary material for: Maternal depression or anxiety during pregnancy and offspring type 1 diabetes: a population-based family-design cohort study
Source: HighWire-hosted journal article supplement (doi:10.1136/bmjdrc-2023-003303), 2023-04-01
Supplement: bmjdrc-2023-003303supp004_data_supplement.pdf [file bmjdrc-2023-003303supp004_data_supplement.pdf]

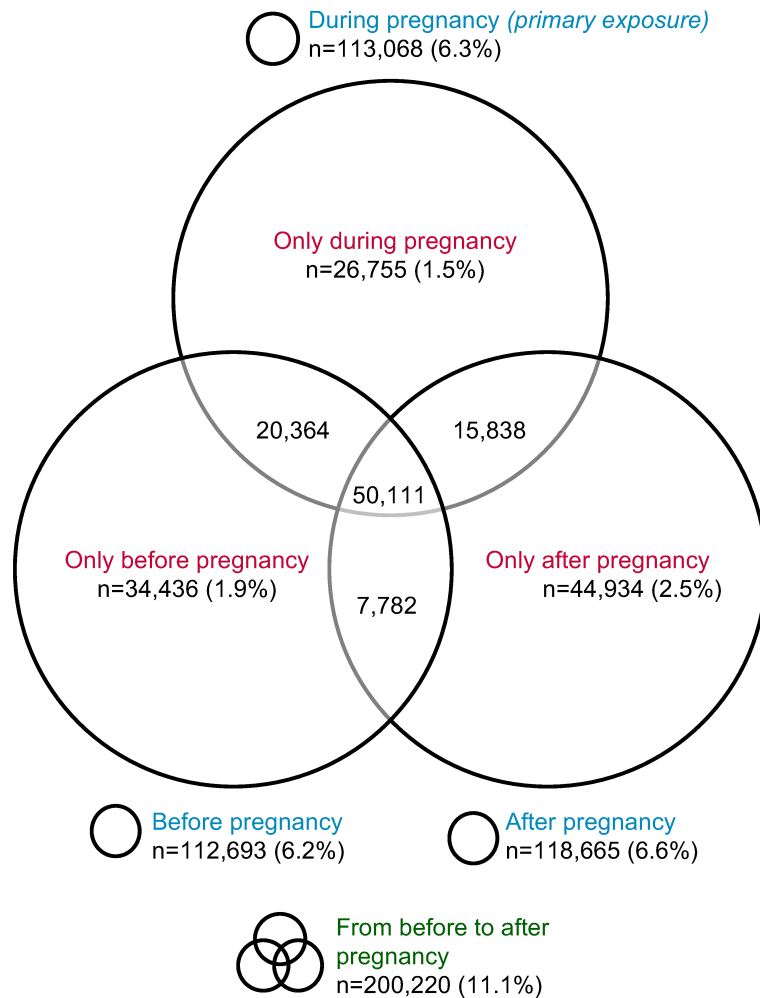

- Green text Any exposure from 1 year before to 1 year after pregnancy.
- Blue text Exposure occurred during this period but may also have occurred during other periods.
- Red text Exposure only occurred during this period and never in any other period.

**Supplemental Figure S3.** Schematic overview of the number of exposed offspring to maternal depression/anxiety before, during, and/or after pregnancy. All percentages are based on the total number of offspring in the cohort.
